# Supplementary material
Source: PubMed Central journal article supplement (PMC2708872)
Supplement: supp_M901111200_Figure-S1.pdf [file supp_M901111200_Figure-S1.pdf]

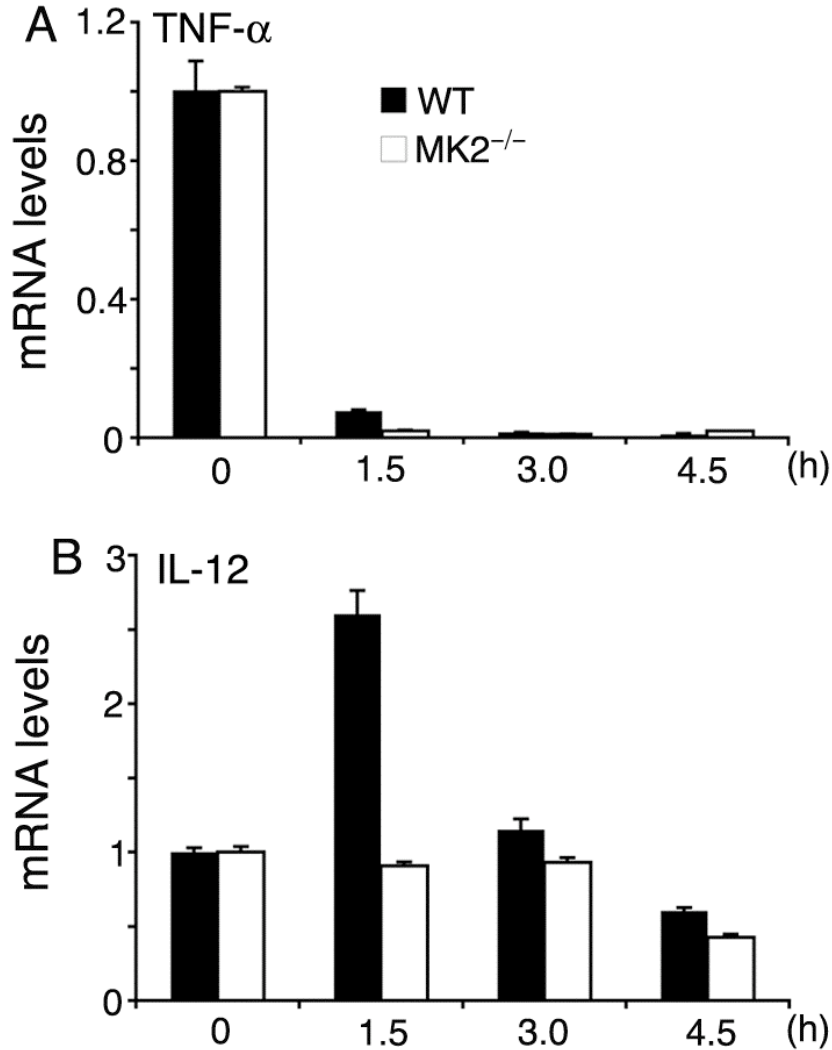

**FIGURE S1. Analysis of TNF- $\alpha$  and IL-12 mRNA stability in Pam<sub>3</sub>CSK<sub>4</sub>-stimulated macrophages.** WT and MK2<sup>-/-</sup> macrophages in 24-well microtiter plates ( $\sim 1 \times 10^6$  cells/well) were stimulated with 10 ng/ml of Pam<sub>3</sub>CSK<sub>4</sub>. After 4 h, actinomycin D (10  $\mu$ g/ml) was added to stop transcription, at the indicated time points cells were harvested, and total RNA isolated. The levels of TNF- $\alpha$  (*panel A*) and IL-12 (*panel B*) mRNA were quantified by real time RT-PCR. The mRNA levels were normalized with respect to endogenous  $\beta$ -actin mRNA. The experiments were performed two times each time in triplicates. Mean values  $\pm$  SEM are plotted.
